# Supplementary material for: Concurrent genome and epigenome editing by CRISPR-mediated sequence replacement
Source: PubMed Central journal article supplement (PMC6862751; doi:10.1186/s12915-019-0711-z), 2019-11-18
Supplement: 12915_2019_711_MOESM3_ESM.pdf [file 12915_2019_711_MOESM3_ESM.pdf]

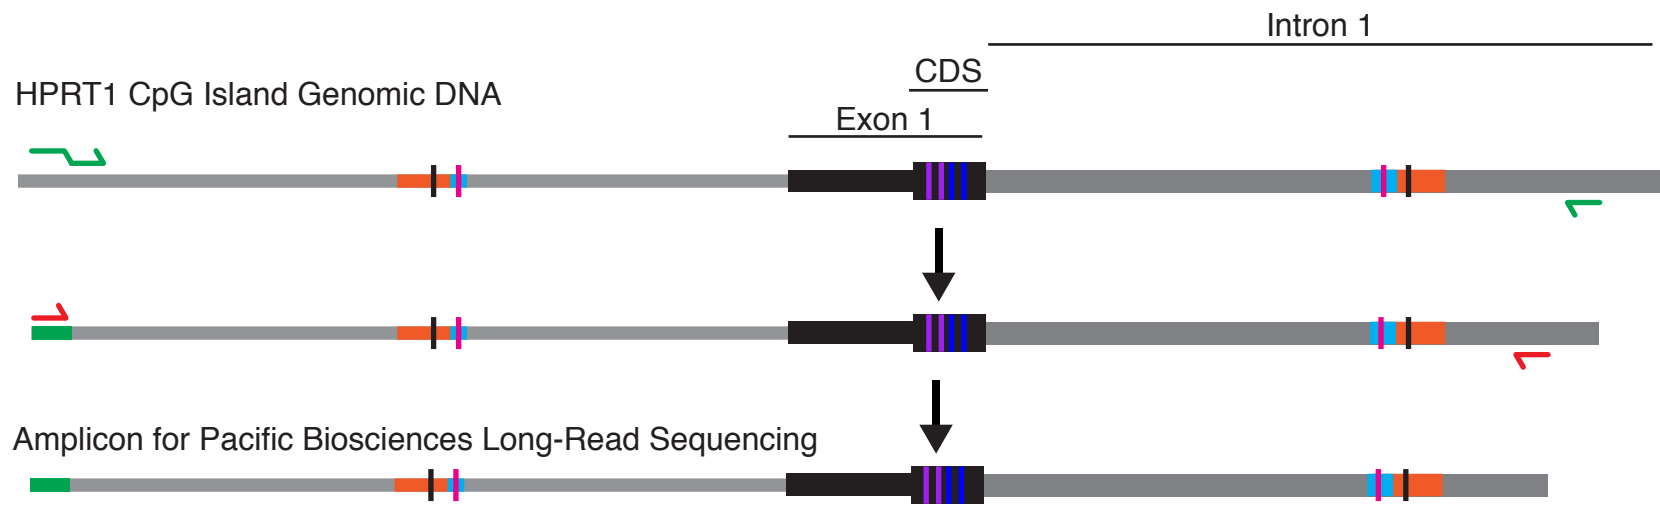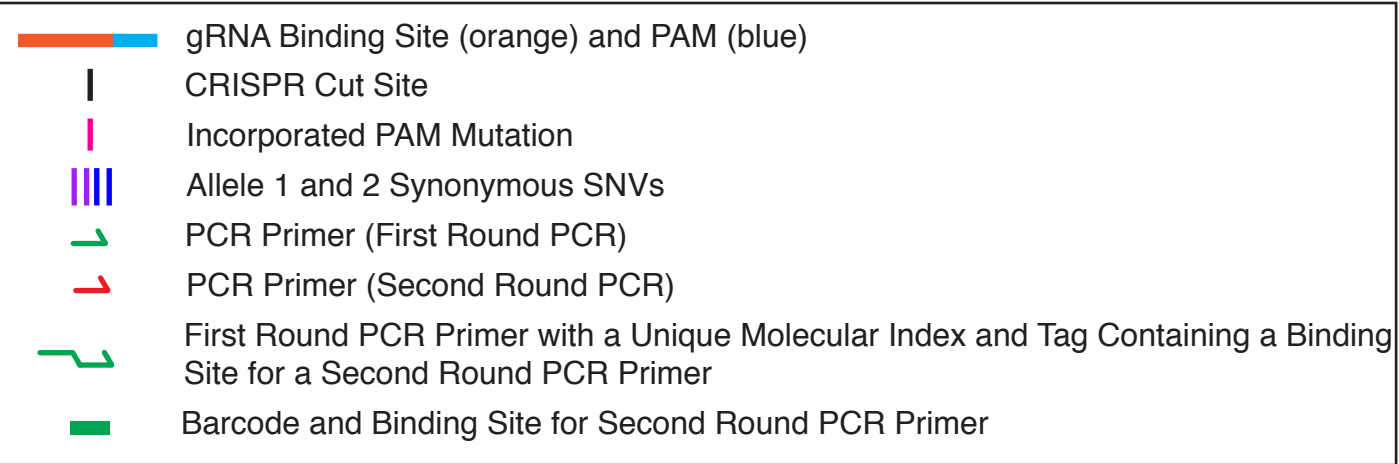

Note: Graphics are not to scale.
